# Supplementary figures and images for: From plasmodesma geometry to effective symplasmic permeability through biophysical modelling
Source: eLife journal article supplement (doi:10.7554/elife.49000), 2019-11-22

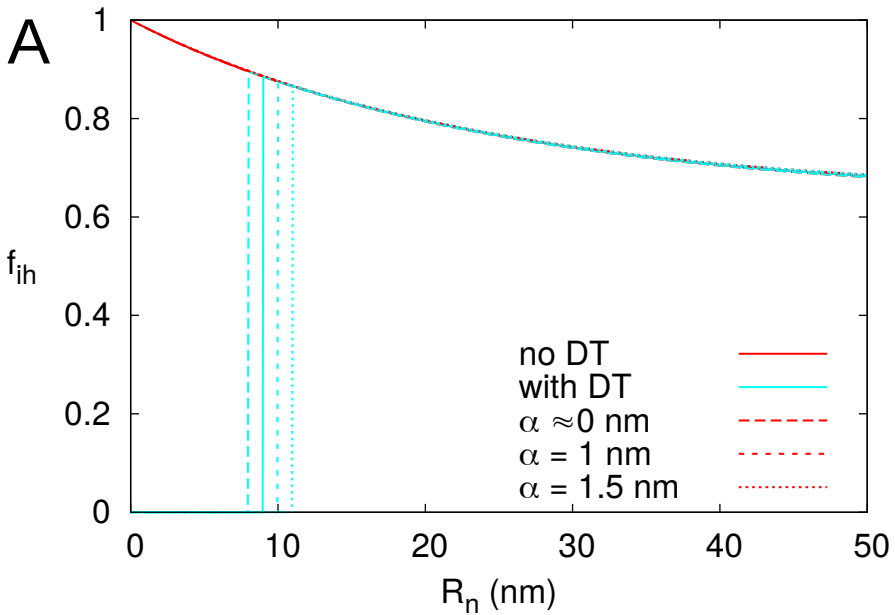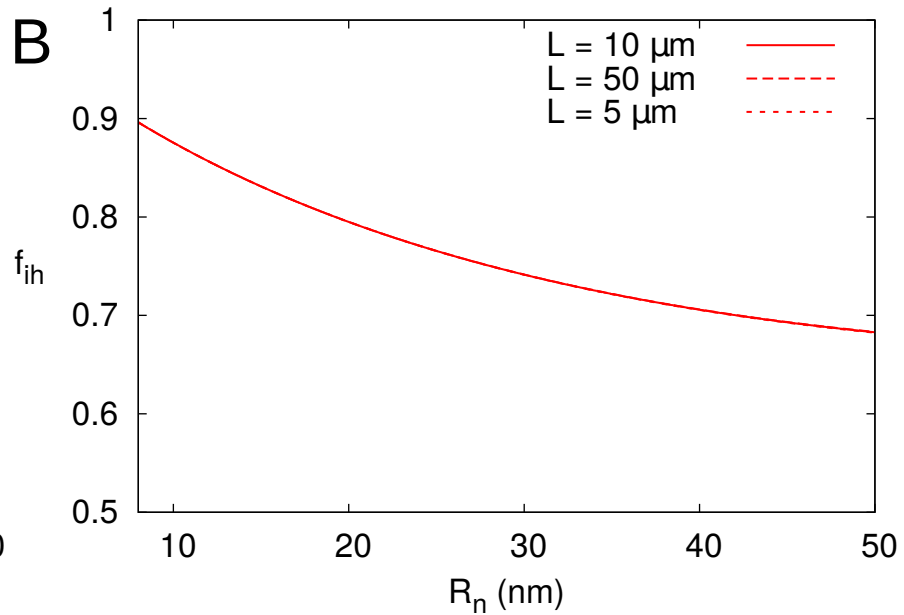

Supplement: supp [file elife-49000-supp-v1.zip]

**A** $\Pi(\alpha)$  with / without hindrance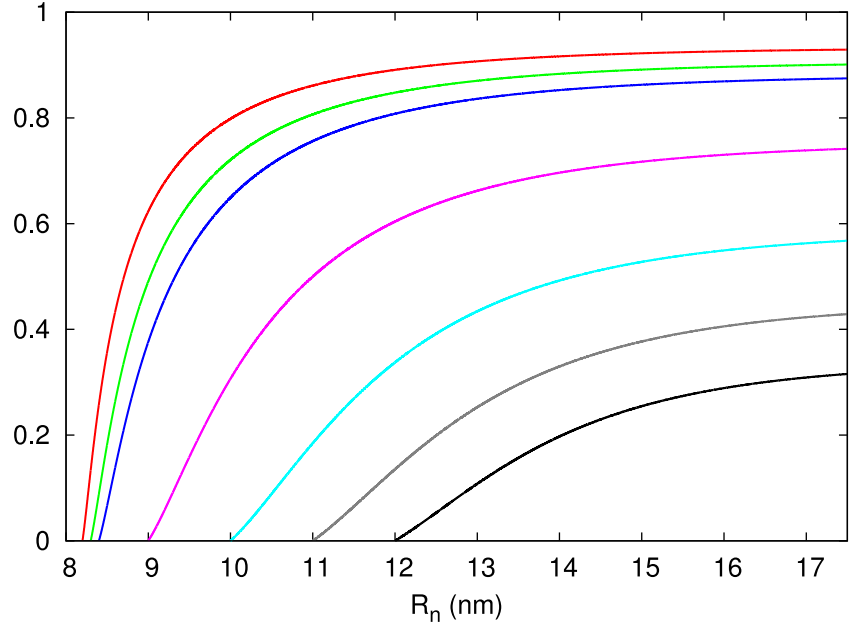**B** $\Pi(\alpha)$  full:only steric hindrance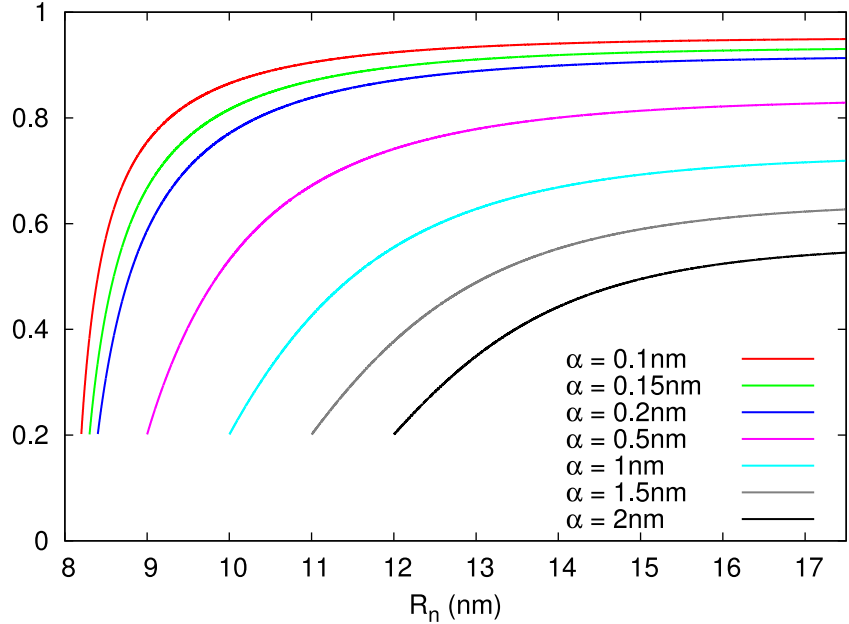

Supplement: supp [file elife-49000-supp-v1.zip]

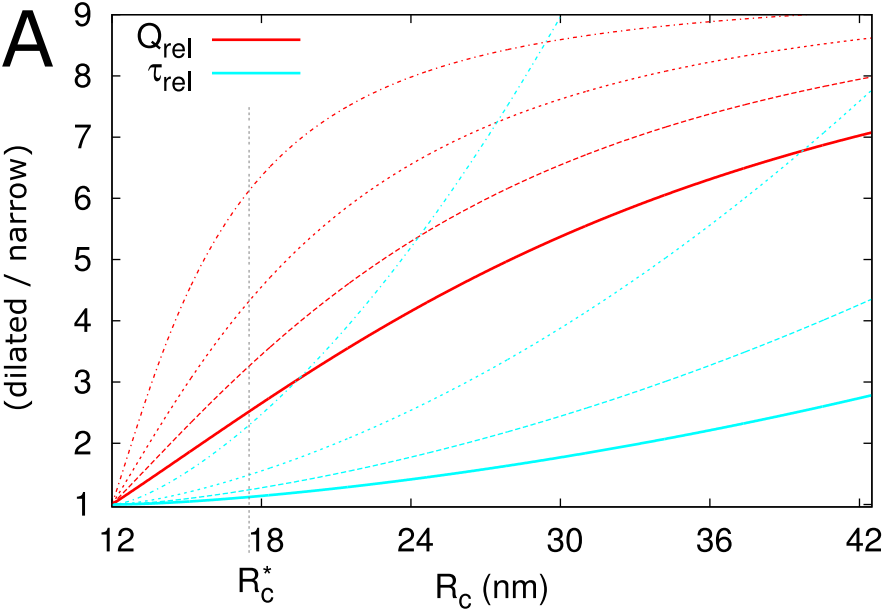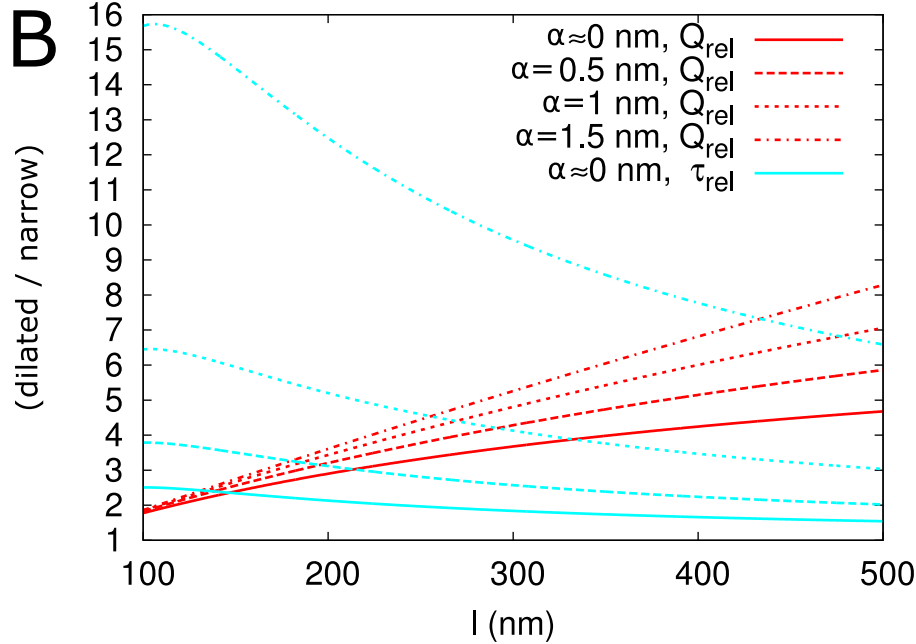

Supplement: supp [file elife-49000-supp-v1.zip]

**A**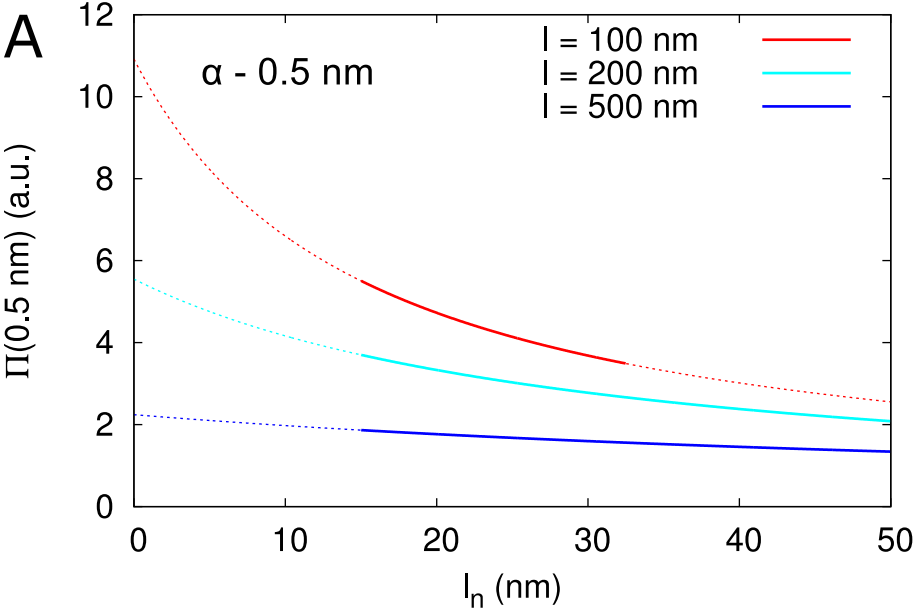**B**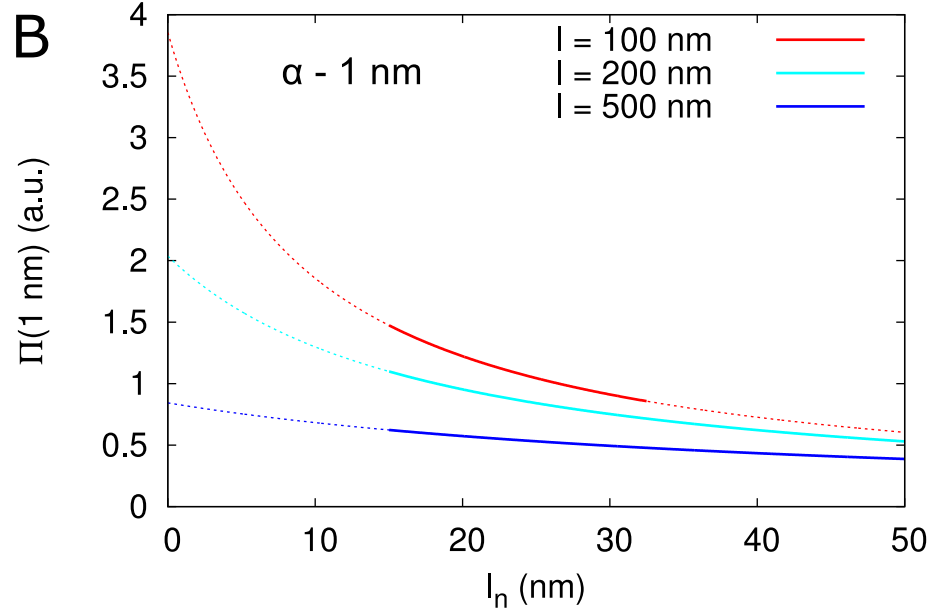**C**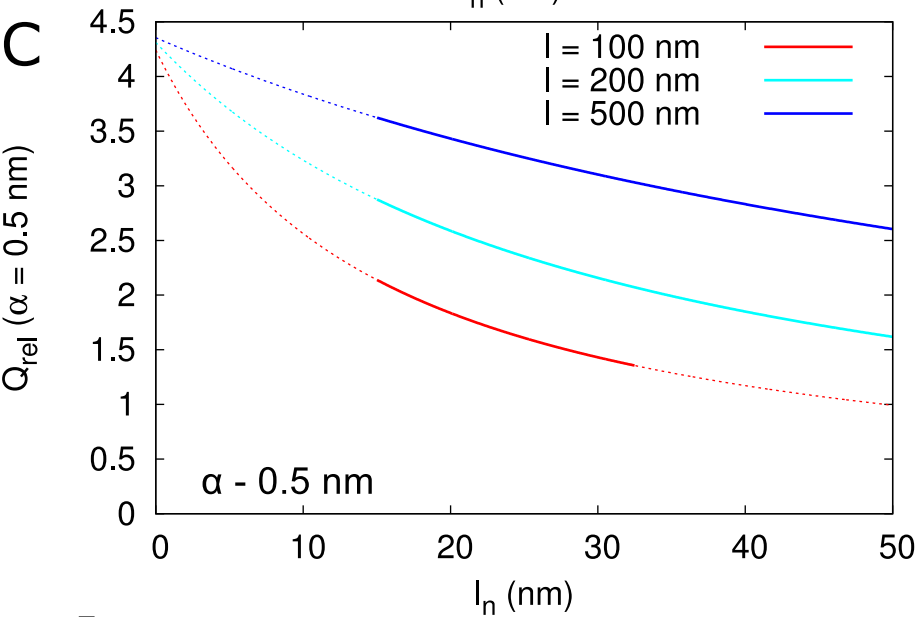**D**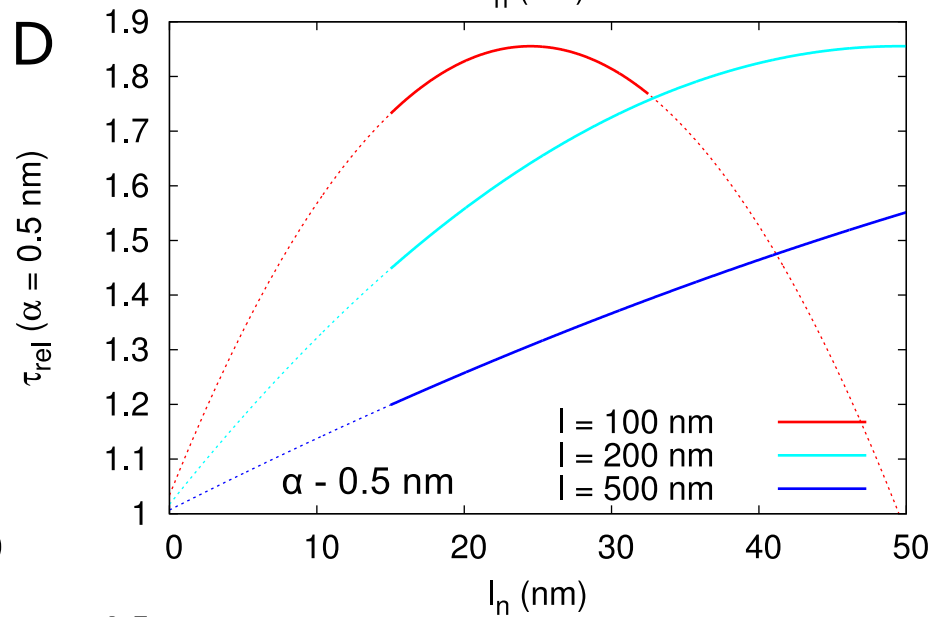

Supplement: supp [file elife-49000-supp-v1.zip]
